# Supplementary material for: Cloud Detection in All-Sky Images via Multi-scale Neighborhood Features and Multiple Supervised Learning Techniques
Source: Copernicus journal article supplement (doi:10.5194/amt-2016-169), 2016-08-09
Supplement: Supplementary file [file amt-2016-169-AC5-supplement.pdf]

# Cloud Detection in All-Sky Images via Multi-scale Neighborhood Features and Multiple Supervised Learning Techniques

Hsu-Yung Cheng <sup>a\*</sup>, Chih-Lung Lin <sup>b</sup>

<sup>a</sup>Department of Computer Science and Information Engineering, National Central University. No.300 Jhongda Rd.,  
Jhongli City, Taoyuan 32001, Taiwan

<sup>b</sup>Department of Electronic Engineering, Hwa Hsia University of Technology, Taiwan

**Abstract:** Cloud detection is important for providing necessary information such as cloud cover in many applications. Existing cloud detection methods include red-to-blue ratio thresholding and other classification based techniques. In this paper, we propose to perform cloud detection using supervised learning techniques with multi-resolution features. One of the major contributions of this work is that the features are extracted from local image patches with different sizes to include local structure and multi-resolution information. The cloud models are learned through the training process. We consider classifiers including random forest, support vector machine and Bayesian classifier. To take advantage of the clues provided by multiple classifiers and various levels of patch sizes, we employ a voting scheme to combine the results to further increase the detection accuracy. In the experiments, we have shown that the proposed method can distinguish cloud and non-cloud pixels more accurately compared with existing works.

**Keywords:** All-sky Image; Cloud Detection; Multi-resolution; Classifier; Supervised Learning

## 1 Introduction

---

\* Corresponding author. Tel.: +886-3-4227151 ext35306, fax: +886-3-422-2681

Email address: chengsy@csie.ncu.edu.tw

24 With the trend of sustainable and green energy, there is a growing demand for solar energy  
25 technology. To utilize solar energy effectively, integrated and large scale photovoltaic systems need to  
26 overcome the unstable nature of solar resource (Gueymard, 2004; Heinemann et al., 2006; Lorenz et al.,  
27 2009). The ability to forecast surface solar irradiance is helpful for planning and deployment of  
28 electricity generated by different units. Numerical weather prediction information or satellite images are  
29 popular materials used for wide-range prediction (Marquez and Coimbra, 2011; Perez et al., 2002; Perez  
30 et al., 2010; Remund et al., 2008). However, the resolution of prediction with respect to space and time  
31 obtained by weather prediction information or satellite cloud images is relatively coarse compared to the  
32 resolution desired for photovoltaic grid operators. For more refined spatial and temporal resolution of  
33 irradiance prediction, researches that analyze images obtained from devices capturing skies have  
34 emerged. Ground-based sky camera systems have been proposed to capture the images of the sky  
35 (Sabburg and Wong, 1999), allowing researchers to study the relationship between the sun and clouds  
36 and the effect of clouds. **Devices developed to monitor the sky presented in some of the pioneering**  
37 **works include Whole Sky Imager (Kassianov et al., 2005; Li et al., 2004), Whole Sky Camera (Long et**  
38 **al., 2006), All-Sky Imager (Kubota et al., 2003), and Total Sky Imager (Pfister et al., 2003). More recent**  
39 **commercial products include all-sky cameras by Eko Instruments, Oculus, and SBIG.** These devices are useful  
40 to make up the deficiency of satellite cloud observations in terms of spatial and temporal resolutions.

41 Cloud coverage, configurations and types are critical factors that influence the solar irradiance. A  
42 category of research works are devoted to detecting (Long et al., 2006), classifying (Calbo and Sabburg,  
43 2008; Heinle et al., 2010; Isosalo et al., 2007; Liu et al., 2015; Martínez-Chico et al., 2011; Zhuo et al.,  
44 2014), and tracking clouds (Marquez and Coimbra, 2013; Tapakis and Charalambides, 2013;  
45 Wood-Bradley et al., 2012). The relationships between cloud coverage and surface solar irradiance have  
46 been explored (Feister and Shields, 2005; Fu and Cheng, 2013; Pfister et al., 2003). It has been shown  
47 that cloud fraction and surface irradiance are negatively correlated under most conditions. In addition to  
48 providing cloud coverage information, accurate cloud detection result could further improve the cloud  
49 type classification accuracy (Cheng and Yu, 2015). It has been established that employing cloud type

50 information in the process of short-term irradiance prediction **could** yield more accurate prediction  
51 results (Cheng and Yu, 2015).

52 Cloud detection in all-sky image is to decide if a pixel belongs to a cloud. Traditionally, **red to blue**  
53 **ratio** (RBR) of each pixel is used to indicate whether the dominant source of the pixel is from clear sky  
54 or clouds (Chow et al., 2011; Johnson et al., 1989, 1991; Long et al., 2006; Shields et al., 2007, 2009).  
55 Then, a threshold is applied to RBR to determine cloud pixels in a sky image. The pixels whose RBRs  
56 are lower than the threshold are classified as clear sky and the pixels whose RBRs are higher the  
57 threshold are labeled as clouds. **Selecting a good threshold is very important for RBR method. The work**  
58 **by Long et al. (2006) suggested that different thresholds should be selected depending on the relative**  
59 **position of the pixel being classified in contrast to the positions of sun and horizon.** In addition to pure  
60 color characteristics, Roy et al. (2001) tried a neural network approach with a wider range of variables  
61 for cloud segmentation. West et al. (2014) also used a neural network to classify pixels. The features  
62 they used are colors and the distance of the pixel to the sun. Under lower-visibility conditions, aerosol  
63 and thin clouds tend to cause errors in cloud determination. To improve the accuracy of the single  
64 threshold method, Huo and Lu proposed an integrated method for cloud determination under low  
65 visibility conditions (Huo and Lu, 2009). The integrated cloud-determination algorithm uses fast Fourier  
66 transform, symmetrical image features, and self-adaptive thresholds. Li et al. (2011) proposed a hybrid  
67 thresholding algorithm (HYTA) for cloud detection on ground-based color images, aiming at  
68 complementing fixed thresholding and adaptive thresholding algorithms. HYTA identifies the ratio  
69 image as either unimodal or bimodal according to its standard deviation. Then, the unimodal and  
70 bimodal images are handled by fixed and minimum cross entropy (MCE) thresholding algorithms,  
71 respectively. Kazantzidis et al. (2012) tuned multiple heuristic thresholds on RGB color components to  
72 detect clouds. The above mentioned works mostly consider the features extracted from each single pixel,  
73 but do not consider the local image patch and structure around the pixel. Bernecker et al. (2013) used  
74 color and texture as features. After applying deep belief networks to learn the structure of the features, a  
75 random forest classifier is used to classify image patches into three classes: sky, cloud, and thick cloud.  
76 Bernecker et al. proposed to utilize information of image patch. However, they used fixed-size patches

77 for training and classification without considering multiresolution information. Patches with sizes that  
78 are too large would include features from both sky and clouds. On the other hands, patches with sizes  
79 that are too small might not include enough information to represent the appearance of the clouds.

80 In this paper, we propose to perform cloud detection via extracting features from local image  
81 patches with various sizes. Patches of different sizes extract information at different levels of resolution.  
82 For classification, we utilize multiple supervised learning techniques. We regard the cloud detection  
83 problem as a two-class classification problem. In other words, we classify each pixel in the image as  
84 cloud or non-cloud. The cloud models are learned through the training process. We consider classifiers  
85 including Support Vector Machine (SVM), random forest, and Bayesian classifier. To extract features  
86 from each pixel, we calculate the red and blue ratio (RBR) as well as the color components of various  
87 color models including RGB (Red, Green, Blue), HSV (Hue, Saturation, Value), and YCbCr. To take  
88 advantage of the clues provided by multiple classifiers and multi-level resolution, we employ a scheme  
89 to combine multiple classification results to further increase the cloud detection accuracy. The  
90 methodology, including the features and the classifiers, is elaborated in Section 2. In Section 3, the  
91 proposed system framework is validated using a set of experimental images with manually labeled  
92 ground truth. The experimental results using different classifiers are demonstrated and discussed. Finally,  
93 conclusions are made in Section 4.

## 94 95 2 Methodology

96 The proposed system framework is illustrated in Fig. 1. For each all-sky image, Hough line transform is  
97 performed first to detect the vertical line of the sun, which is caused by the CCD device when capturing  
98 all-sky images. The pixels on this line often has bright intensities and could be confused as cloud pixels.  
99 After detecting and eliminating the vertical line of the sun, the rest of the pixels in the image are  
100 classified as cloud or non-cloud. The input images are RGB color images. For each all-sky image, the  
101 color components in various color space are computed. The color models considered in this work  
102 include RGB, HSV, and YCbCr. In addition to the above mentioned color components, the RBR of  
103 each pixel is also calculated and considered as a feature. To perform pixel-wise classification, all the

104 color components and the RBR of the local image patches around a pixel are collected and  
 105 concatenated as a feature vector for the pixel. Training samples are obtained from manually labeled  
 106 ground truth images.  
 107

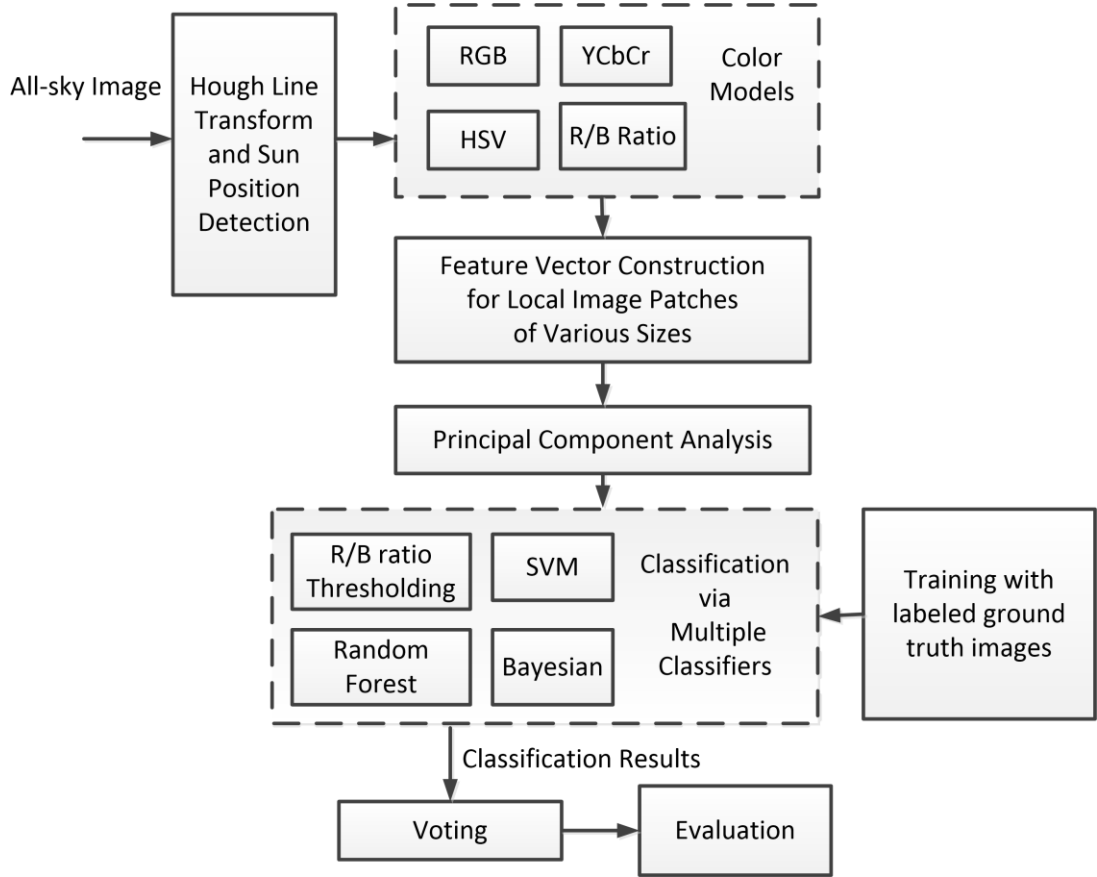

108  
 109 Fig. 1. System framework

## 110 2.1 Hough Line Transform and Sun Position Detection

112 Hough transform (Shapiro, 2011) is used to detect the vertical line of sun in an all-sky image. The  
 113 procedure of detecting lines can be regarded as finding the coefficients of the line equations using  
 114 a voting mechanism. The procedure of detecting lines via voting in the parameter space can be  
 115 achieved by dividing the parameter space into grids. Because all the pixels satisfying a certain line  
 116 equation would vote to the same grid, a high vote would appear in the corresponding grid in the  
 117 parameter space. Hough transform re-parameterizes the line equation as  $x \cos \theta + y \sin \theta = \rho$  to  
 118 avoid using the slope parameter for line equation  $y=mx+b$ . Because possible values for the slope  
 119 parameter  $m$  ranges from minus infinity to infinity, it would be infeasible to find the slope  
 120 parameter  $m$  via grid search. After, re-parameterizing the line equation, the range of the parameter

$\rho$  can be set according to the width and height of the image. And the range of the parameter  $\theta$  is from  $-180^\circ$  to  $180^\circ$ . Fig. 2 displays an example of Hough line detection on an image. After detecting the vertical line, the sun position is determined by accumulating the intensities of the pixels along x direction in a window with width  $w_1$ . The position with the highest accumulated intensity is the center of the sun. The pixels in the line window with a fixed width  $w_2$  are eliminated from the image. The pixels within the sun position and the line window with width  $w_2$  are determined as non-cloud pixels and do not have to go through the subsequent classification steps. The values of  $w_1$  and  $w_2$  are determined depending on the size of the all-sky images. In our experiments, we set  $w_1$  and  $w_2$  as 60 and 12 pixels, respectively.

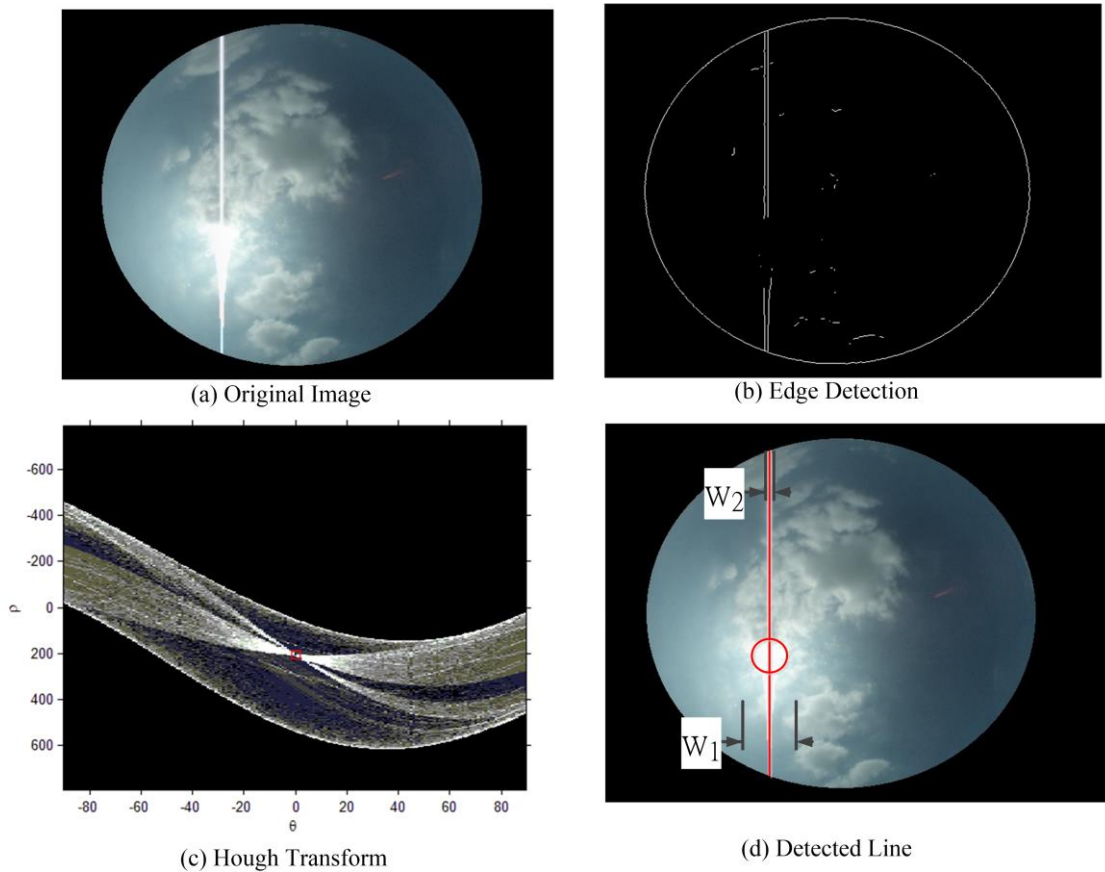

Fig. 2. Hough Line Detection and Sun Position Detection

## 2.2 Color Models

RGB is a very common color model, being used in most computer systems. It is an additive color model based on tri-chromatic theory. RGB is easy to implement. However, it is non-linear with visual perception, and the specification of colors is semi-intuitive. HSV is a color model that describes colors in terms of hue, saturation and value components (Gonzalez, 2002). Hue is expressed as a number from 0 to 360 degrees. The hue component of red starts at 0, green starts at 120, and blue starts at 240. Saturation is the amount of gray in the color. And the value component describes the brightness or intensity of the color. YCbCr is a color space used in video and digital photography systems. Y is the luminance component, and Cb and Cr are the blue-difference and red-difference chroma components. HSV and YCbCr color components can be obtained from RGB color components using color model transformation equations (Gonzalez, 2002; Poynton, 2003). Although the color models are not independent and including color components from different color models may introduce redundancy in the feature vector, considering various color models still provides the classifier more information that is beneficial to performing classification.

## 2.3 Feature Vector Construction for Local Image Patches of Various Sizes

For each pixel, local image patches with various sizes are used to extract features. The size of the image patch at level  $i$  is  $L_i \times L_i$ ,  $i = 1 \dots \ell$ , where  $\ell$  denotes the total number of levels. For each local image patch, the color components and the red to blue ratio (RBR) of all the pixels in the patch are concatenated to form a feature vector. Consequently, the dimension of each feature vector is  $L_i \times L_i \times 10$ . There are  $\ell$  feature vectors constructed for each pixel.

## 2.4 Dimension Reduction

We apply Principal Component Analysis (PCA) (Duda et al., 2001) on the feature vectors to reduce their dimensions. Based on the assumption that the importance of the features lies in the variability of the data, PCA chooses principal components along the directions with the largest variance of the data distribution first. The principal components are a set of new orthogonal bases that can be used to re-express the data in order to reduce the correlation among different variables. Suppose that the original dataset has  $N_{\text{Samples}}$  samples and each sample has  $D_I$  variables. The data

matrix  $X$  is established with each sample as a column vector. Therefore the data matrix  $X$  has  $N_{Samples}$  columns and  $D_1$  rows. If we would like to reduce the feature dimension to  $D_2$ , then we need to select  $D_2$  principal components. PCA constructs a matrix  $X^T X$ , which is a matrix proportional to the sample covariance matrix of the dataset  $X$ . The first  $D_2$  eigenvectors of  $X^T X$  whose corresponding eigenvalues are largest are chosen as principal components. To determine the desired number of dimensionality  $D_2$ , we check the eigenvalue ratio  $R_{Eigenvalue}$

$$R_{Eigenvalue} = \frac{\sum_{k=1}^{D_2} |\lambda_k|}{\sum_{k=1}^{D_1} |\lambda_k|} \quad (1)$$

In Eq. (1),  $\lambda_k$  denotes the  $k^{\text{th}}$  Eigenvalue of  $X^T X$ . The first  $D_2$  Eigenvectors are preserved so that  $R_{Eigenvalue}$  is larger than a threshold  $Thr_{PCA}$ . The selection of  $Thr_{PCA}$  is discussed in the experiments in Section 3.

## 2.5 Classifiers

### 2.5.1 Random Forest

Classification and Regression Tree (CART) is a systematic procedure that learns decision trees proposed by Breiman et al. (1984). The splitting rules of the tree include an attribute value test at each node of the tree. Starting from the root node, all training data is used to split the root node. **The tree is then built recursively.** Considering all the possible splitting rules, CART would construct the tree by selecting the splitting rule that can maximize the impurity drop when a node is added. The impurity measures the condition of mixed class labels at each node. The goal is to make the class labels at each node as “pure” as possible. The splitting process stops when all the samples in a node have the same class label, or when the measure of purity at the child nodes cannot be improved compared with its parent node. After a decision tree is built, it might need to be pruned using a cross-validation procedure. The reason for pruning is that some branches of the tree might over-fit the training data. In our experiment, we use 10 fold cross validation. Instead of growing a single decision tree, random



188 forest grows an ensemble of trees and lets them vote for the most popular class label. In this  
 189 work, we adopt random split selection (Dietterich 1999) to build the ensemble of trees. At each  
 190 node, the split is selected at random from the K best splits. The features for the split rules are  
 191 randomly selected. It reduces the correlation between the trees and improves the efficiency of  
 192 training.

### 193 2.5.2 Support Vector Machine

194 The Support Vector Machine (SVM) learns a set of hyperplanes that maximize the margins  
 195 between the hyperplanes and the training samples in order to lower the classification error of  
 196 unknown testing samples. The motivation of SVM is that an ideal decision boundary should  
 197 have the largest distance to the nearest training sample of all the classes. However, it might be  
 198 infeasible to separate data samples using linear hyperplanes in practice. Therefore, soft  
 199 margins and kernel functions are applied in the SVM in practice. We apply SVM with radial  
 200 basis functions (RBF) as one of the classifiers in this work. For the details of SVM, please  
 201 refer to the work by Cristianini and Shawe-Taylor (2000).

### 202 2.5.3 Bayesian Classifier

203 Bayesian classifier aims at minimizing the probability of misclassification by classifying a  
 204 sample  $x$  to the class  $\omega_k$  with the largest posterior probability  $P(\omega_k | x)$ . Since the posterior  
 205 probability  $P(\omega_k | x)$  itself is unknown, we need to transform the problem using the  
 206 probabilities that can be obtained via training samples. Bayesian classifier uses the Bayes'  
 207 theorem to re-express the posterior probability using

$$208 \quad P(\omega_k | x) = \frac{P(\omega_k)P(x | \omega_k)}{P(x)} \quad (2)$$

209 In Eq. (2),  $P(\omega_k)$  denotes the prior probability, which is independent of the testing sample.  
 210 In other words,  $P(\omega_k)$  states how likely a pixel belongs to cloud or non-cloud regardless of  
 211 its observed feature vector. It is possible to use meteorological conditions and weather  
 212 forecast report to determine different prior probabilities  $P(\omega_k)$  for each day. However, we use

the same prior probabilities for both cloud and non-cloud classes for simplicity, and no meteorological information is required to be involved as prior knowledge in our decision process. The class conditional probability  $P(x|\omega_k)$  in Eq. (2) can be learned from the training samples. We use Gaussian distributions

$$P(x|\omega_k) = \frac{1}{(2\pi)^{p/2} |\Sigma_k|^{1/2}} e^{-\frac{1}{2}(x-\mu_k)\Sigma_k^{-1}(x-\mu_k)^T} \quad (3)$$

to model the class conditional probability  $P(x|\omega_k)$  for each class. In Eq. (3),  $\mu_k$  denotes the mean vector,  $\Sigma_k$  denotes the covariance matrix. And  $p$  is the number of dimensionality of  $x$  and  $\mu_k$ , i.e.  $x \in \mathcal{R}^p$  and  $\mu_k \in \mathcal{R}^p$ . To learn the parameters of Gaussian functions, training samples from each class are used to calculate the sample mean vector  $\mu_k$  and the sample covariance matrix  $\Sigma_k$  for the class. The probability of the sample  $P(x)$  in Eq. (2) does not depend on the class label and can be neglected in the decision process.

## 2.6 Combining Results of Multiple Level Neighborhoods and Classifiers

The concept of a multiple expert system is to take advantage of the clues provided by multiple classifiers. Instead of majority voting, we use a different voting scheme to combine the results of multiple-level patches and classifiers. The voting is performed in a multi-scale neighborhood, which is inspired by the works of Lowe (2004) and Bay et al. (2008). As shown in Fig. 3, considering a  $3 \times 3$  neighborhood around a pixel  $p$  at level  $i$ , its previous level  $i-1$  and its next level  $i+1$ , voting is performed in the scale space of its  $3 \times 3 \times 3$  neighborhood. That is, we consider the classifier results of a pixel itself and its 26 neighbors in the  $3 \times 3$  regions at the current and adjacent levels. For the pixels in level  $i-1$  in Fig. 3 (a), the size of the local image patch used for feature vector construction is  $L_{i-1} \times L_{i-1}$  in Fig. 3 (b). Similarly, image patches of size  $L_i \times L_i$  and  $L_{i+1} \times L_{i+1}$  are used for level  $i$  and level  $i+1$ , respectively. The voting scheme takes into account the classification results from 4 classifiers: RBR thresholding, SVM, random forest, and Bayesian classifier. In other words, there are  $27 \times 4$  votes for the pixel. Let  $V_{cloud}(x_{Level_i})$  denotes the number of votes in the neighborhood classified

as cloud for pixel  $x$  at level  $i$ . The decision for a pixel at level  $i$  is determined by  $V_{cloud}(x_{Level_i}) > N_v$ . In other words, if there are more than  $N_v$  votes in the  $3 \times 3 \times 3$  neighborhood of a pixel at level  $i$ , the pixel is classified as a cloud pixel at this level. Considering the example illustrated in Fig. 3 (c), the numbers represent the votes in the  $3 \times 3 \times 3$  neighborhood of pixel  $p$  at level  $i$ . Summing up the numbers in Fig. 3 (c), we can obtain that  $V_{cloud}(x_{Level_i}) = 61$ . If the threshold  $N_v$  equals to 57, then pixel  $p$  is classified as cloud at level  $i$ . For the boundary conditions at level 1 and level  $\ell$ , there is no level  $i - 1$  at level 1, and there is no level  $i + 1$  at level  $\ell$ . There are  $18 \times 4$  votes for the pixels at these two levels. When performing voting for pixels at level 1 and  $\ell$ , as long as the votes for a pixel exceeds threshold  $N_v$ , the pixel is still classified as cloud as that level in our implementation.

To combine the decision at different levels, the probability  $P(x \in cloud \mid Num_{i=1 \sim \ell}(x_{Level_i} \in cloud))$  is computed. The probability  $P(x \in cloud \mid Num_{i=1 \sim \ell}(x_{Level_i} \in cloud))$  states the probability of pixel  $x$  belonging to cloud given the number of levels that the pixel is determined as cloud. Suppose  $Num_{i=1 \sim \ell}(x_{Level_i} \in cloud)$  denotes the number of levels at which pixel  $x$  is determined as cloud among all levels  $i=1$  to  $\ell$ . If  $Num_{i=1 \sim \ell}(x_{Level_i} \in cloud)$  is 0, it means that the pixel is not classified as clouds in any level. If  $Num_{i=1 \sim \ell}(x_{Level_i} \in cloud)$  is  $\ell$ , it means the pixel is classified as clouds in all levels. If  $P(x \in cloud \mid Num_{i=1 \sim \ell}(x_{Level_i} \in cloud))$  is larger than  $P(x \in noncloud \mid Num_{i=1 \sim \ell}(x_{Level_i} \in cloud))$ , the final decision would classify the pixel to be a cloud pixel. The probability  $P(x \in cloud \mid Num_{i=1 \sim \ell}(x_{Level_i} \in cloud))$  can be expressed as Eq. (4) using Bayesian rules of conditional probability. In Eq. (4), the term  $P(Num_{i=1 \sim \ell}(x_{Level_i} \in cloud))$  is independent of class label and would not affect the decision. The prior probabilities  $P(x \in cloud)$  and  $P(x \in noncloud)$  are assumed to be equal as stated in Section 2.4.3. The likelihood term  $P(Num_{i=1 \sim \ell}(x_{Level_i} \in cloud) \mid x \in cloud)$  is learned from the training dataset by constructing the normalized histogram of  $Num_{i=1 \sim \ell}(x_{Level_i} \in cloud)$  using all ground truth cloud pixels.

$$P(x \in \text{cloud} \mid \text{Num}(x_{\text{Level}_i} \in \text{cloud})) = \frac{P(x \in \text{cloud})P(\text{Num}(x_{\text{Level}_i} \in \text{cloud}) \mid x \in \text{cloud})}{P(\text{Num}(x_{\text{Level}_i} \in \text{cloud}))} \quad (4)$$

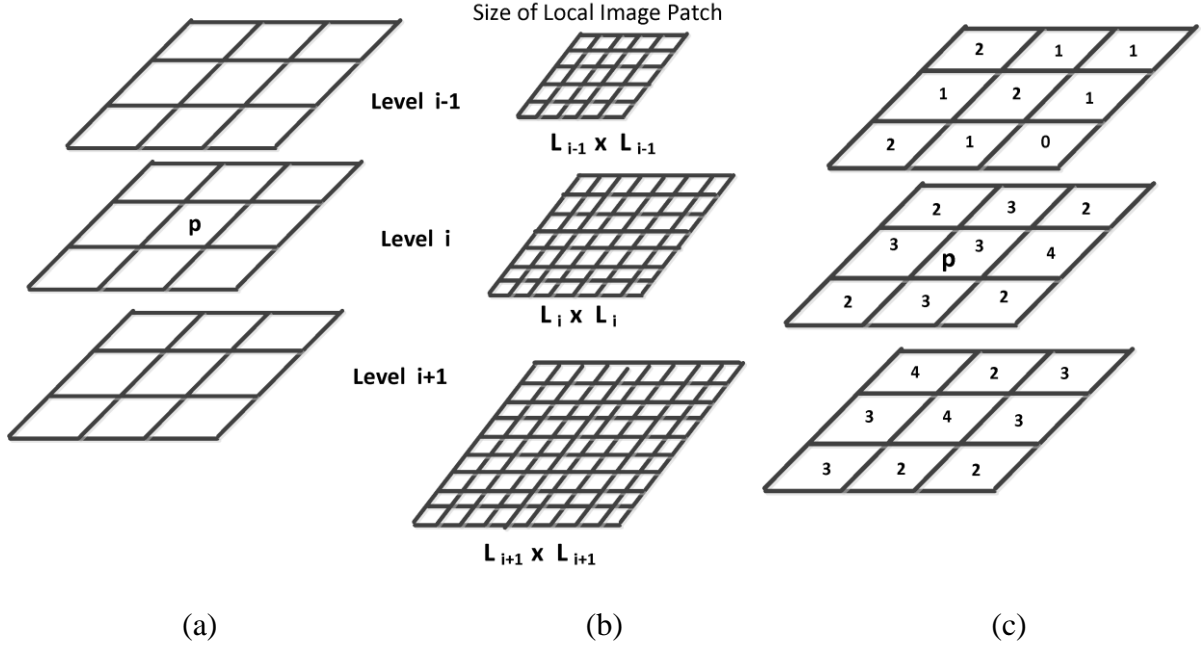

Fig. 3. Voting in the scale space of a  $3 \times 3 \times 3$  neighborhood: (a) Structure of the scale space neighborhood (b) Size of the local image patch at different layers (c) Number of votes in the scale space neighborhood.

### 3 Experimental Results

In this work, the device used to capture the all-sky images is the all-sky camera manufactured by the Santa Barbara Instrument Group (SBIG). The field of view is  $185^\circ$ . The focal length is 1.44 mm. And the focal ratio range is  $f/1.4$ – $f/16$ . The resolution of the bitmap images is  $640 \times 480$ . We manually marked the ground truth of cloud pixels in 250 images for training and testing. These images are collected from January to June, 2014 in [National Central University, Taiwan](#). With the ground truth labels of the images, we are able to calculate the detection accuracy at pixel level. We adopt 10-fold cross validation to calculate the average detection accuracy, precision and recall rate. [Ten-fold cross validation means that the dataset is divided into ten none-overlapping subsets. Nine subsets are used for training, and the remaining one subset is used for testing. Then the training subsets and testing subsets are rotated for 10 times. The average classification rate of these ten experiments is the 10-fold cross](#)

validated accuracy. The definitions of detection accuracy, precision and recall rate are listed in Eq. (5) to Eq. (7).

$$Accuracy = \frac{TP + TN}{TP + TN + FP + FN} \quad (5)$$

$$Precision = \frac{TP}{TP + FP} \quad (6)$$

$$Recall = \frac{TP}{TP + FN} \quad (7)$$

In Eq. (5) to Eq. (7), true positive  $TP$  is the number of cloud pixels correctly detected. True negative  $TN$  is the number of non-cloud pixels that are correctly classified. False positive  $FP$  is the number of non-cloud pixels that are incorrectly classified as clouds. False negative  $FN$  is the number of cloud pixels that are incorrectly classified as non-cloud.

In this work, the RGB thresholding method proposed by Long et al. (2006) will be used as the baseline method for comparison. In Long's work, an RBR threshold is recommended for the Whole Sky Camera and several thresholds are suggested to be used for the Total Sky Imager. Since the desired threshold varies due to different devices and weather conditions, we perform an experiment to test the best threshold for our all-sky camera. Also, to avoid false positive detection at highlighted regions around the sun, we employ an upper bound threshold. Therefore, two thresholds,  $Thr_{upper}$  and  $Thr_{lower}$ , are used in the experiments. A pixel is classified as cloud if its RBR is higher than  $Thr_{lower}$  and lower than  $Thr_{upper}$ . We perform experiments on several thresholds to select the best thresholds for our dataset. In Fig. 4, we can observe the trade-off between precision and recall. As the thresholds become stricter, the precision increases and the recall drops. Precision rate and recall rate cannot be used alone to measure the accuracy since precision does not consider false negatives and recall does not consider false positives. Therefore accuracy defined in Eq. (5) is used as the conclusive metric to measure the performance. As shown in Fig. 4, we have observed that  $Thr_{lower} = 0.8$  and  $Thr_{upper} = 0.9$  yield the best detection accuracy for our dataset. In the rest of the experiments, we use RBR thresholding with  $Thr_{lower} = 0.8$  and  $Thr_{upper} = 0.9$  as a baseline method for comparison. However, even with the best selected RBR thresholds, the cloud detection result is not satisfying. The thresholds  $Thr_{lower} = 0.8$  and  $Thr_{upper} = 0.9$  might cause some false positives for certain images while causing some false negatives

for other images. Therefore, neither raising or lowering the threshold could improve the detection results by thresholding.

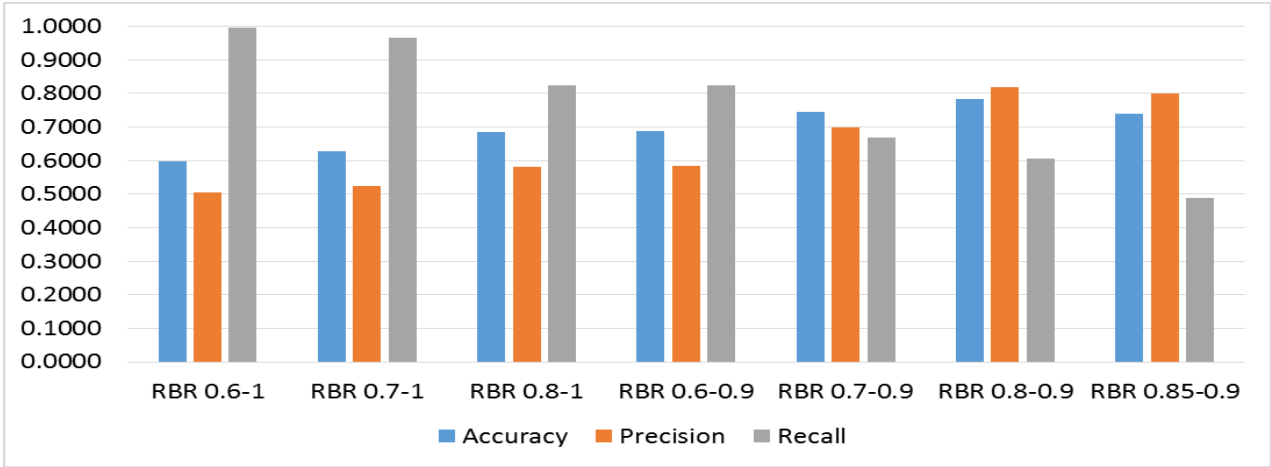

Fig. 4. Cloud detection accuracy using various RBR thresholds

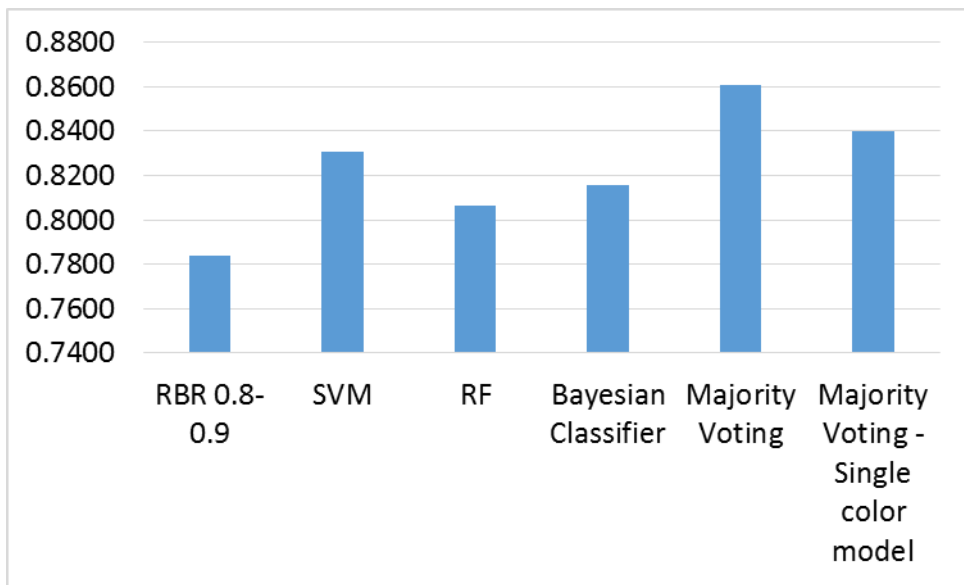

Fig. 5. Comparisons of detection accuracy using different classifiers with single pixel color information

To observe classification results of different classifiers, the detection accuracy of different classifiers based on single pixel color information are plotted in Fig. 5. Compared with other classifiers, RBR thresholding with  $Thr_{lower} = 0.8$  and  $Thr_{upper} = 0.9$  has the lowest detection accuracy. Majority voting of the four detection methods can yield better accuracy. We also compare with the classification accuracy of using only single RGB color model as the feature vector to validate that adding other color models in the feature vector can yield better classification results. With voting schemes that combine the information from multiple

classifiers, the accuracy can be enhanced compared with individual single classifiers. However, utilizing only single pixel color information is not sufficient to give satisfying detection accuracy. Applying features extracted from local image patch is able to further enhance the detection results.

When applying the proposed cloud detection method, we use five levels of local image patches with different sizes, i.e.  $\ell=5$ . The size at each level is  $L_1 = 5$ ,  $L_2 = 10$ ,  $L_3 = 15$ ,  $L_4 = 20$ ,  $L_5 = 25$ . To observe the effect of parameter  $Thr_{PCA}$  for dimension reduction at each level, we perform an experiment using the feature vector constructed at each single level with SVM as the classifier for different settings of  $Thr_{PCA}$ . The value of  $Thr_{PCA}$  is typically between 90%~99% and is selected empirically. Typically, the accuracy of classification would increase as the value of  $Thr_{PCA}$  goes from 100% (which means no dimensionality reduction at all) to 99%. The accuracy of classification would continue increasing until  $Thr_{PCA}$  reaches a certain value, which is caused by the benefit of dimensionality reduction. After that, the accuracy of classification would start to decrease due to too much information loss. We plot the cross-validated detection accuracy in Fig. 6. From Fig. 6, we can observe that the detection accuracy at single level using SVM is highest for  $Thr_{PCA}=97\%$  at levels  $L_1$  and  $L_2$ . At levels  $L_3$ ,  $L_4$  and  $L_5$ , the parameter  $Thr_{PCA}=95\%$  yields better results. Therefore, for levels  $L_1$  and  $L_2$ ,  $Thr_{PCA}=97\%$  is selected; for levels  $L_3$ ,  $L_4$  and  $L_5$ ,  $Thr_{PCA}=95\%$  is selected.

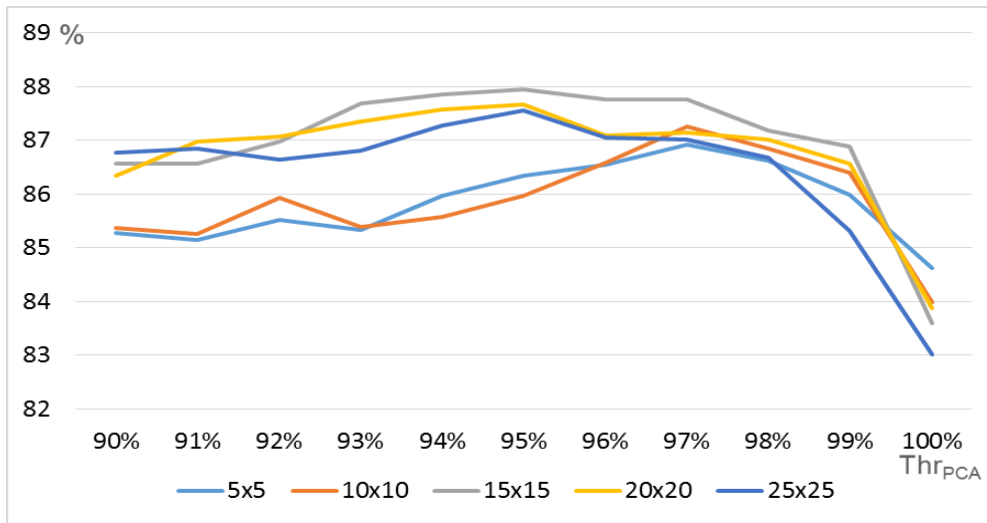

Fig. 6. Detection accuracy with different  $Thr_{PCA}$  settings in Eq. (5) at each level using SVM

To combine results of multiple level patches and classifiers, the threshold for voting  $N_v$  needs to be determined. The detection accuracy of combining the results using different  $N_v$  settings is plotted in Fig. 7. As shown in Fig. 7, when  $N_v$  ranges from 50 to 70, the detection accuracy is higher. We select  $N_v=57$  for the proposed method.

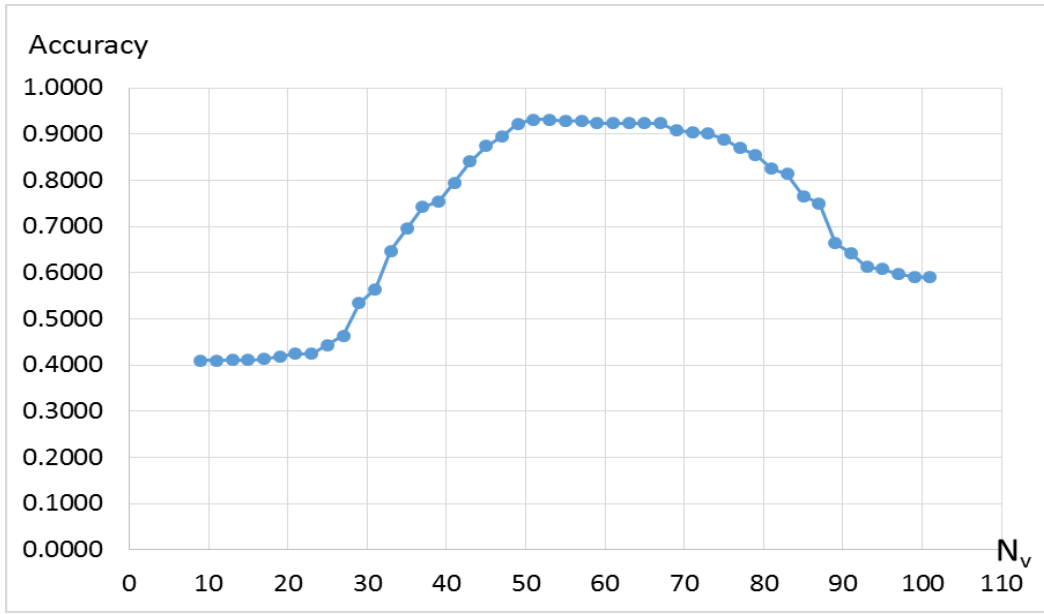

Fig. 7. Detection accuracy with different  $N_v$  settings

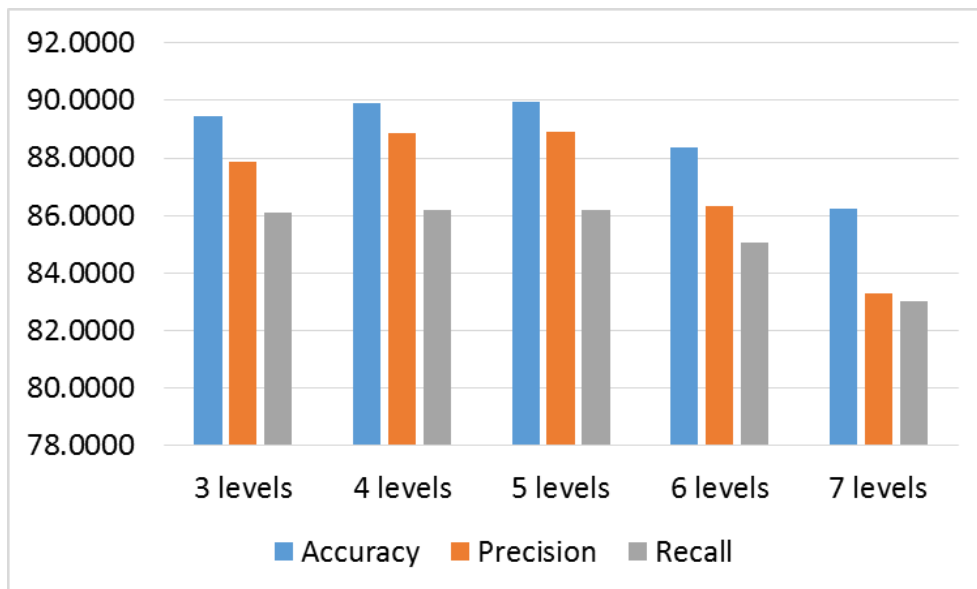

Fig. 8. Detection accuracy using different number of levels

To test the number of levels required to yield better detection results, we plot the detection accuracy using different number of levels in Fig. 8. Note that for the 6<sup>th</sup> level and 7<sup>th</sup> level, the size of the local image patch



352 is  $L_6 = 30$  and  $L_7 = 35$ . We can observe that using 4 or 5 levels results in better detection accuracy. When  
 353 involved with levels with image sizes that are too large, the detection accuracy drops.

354

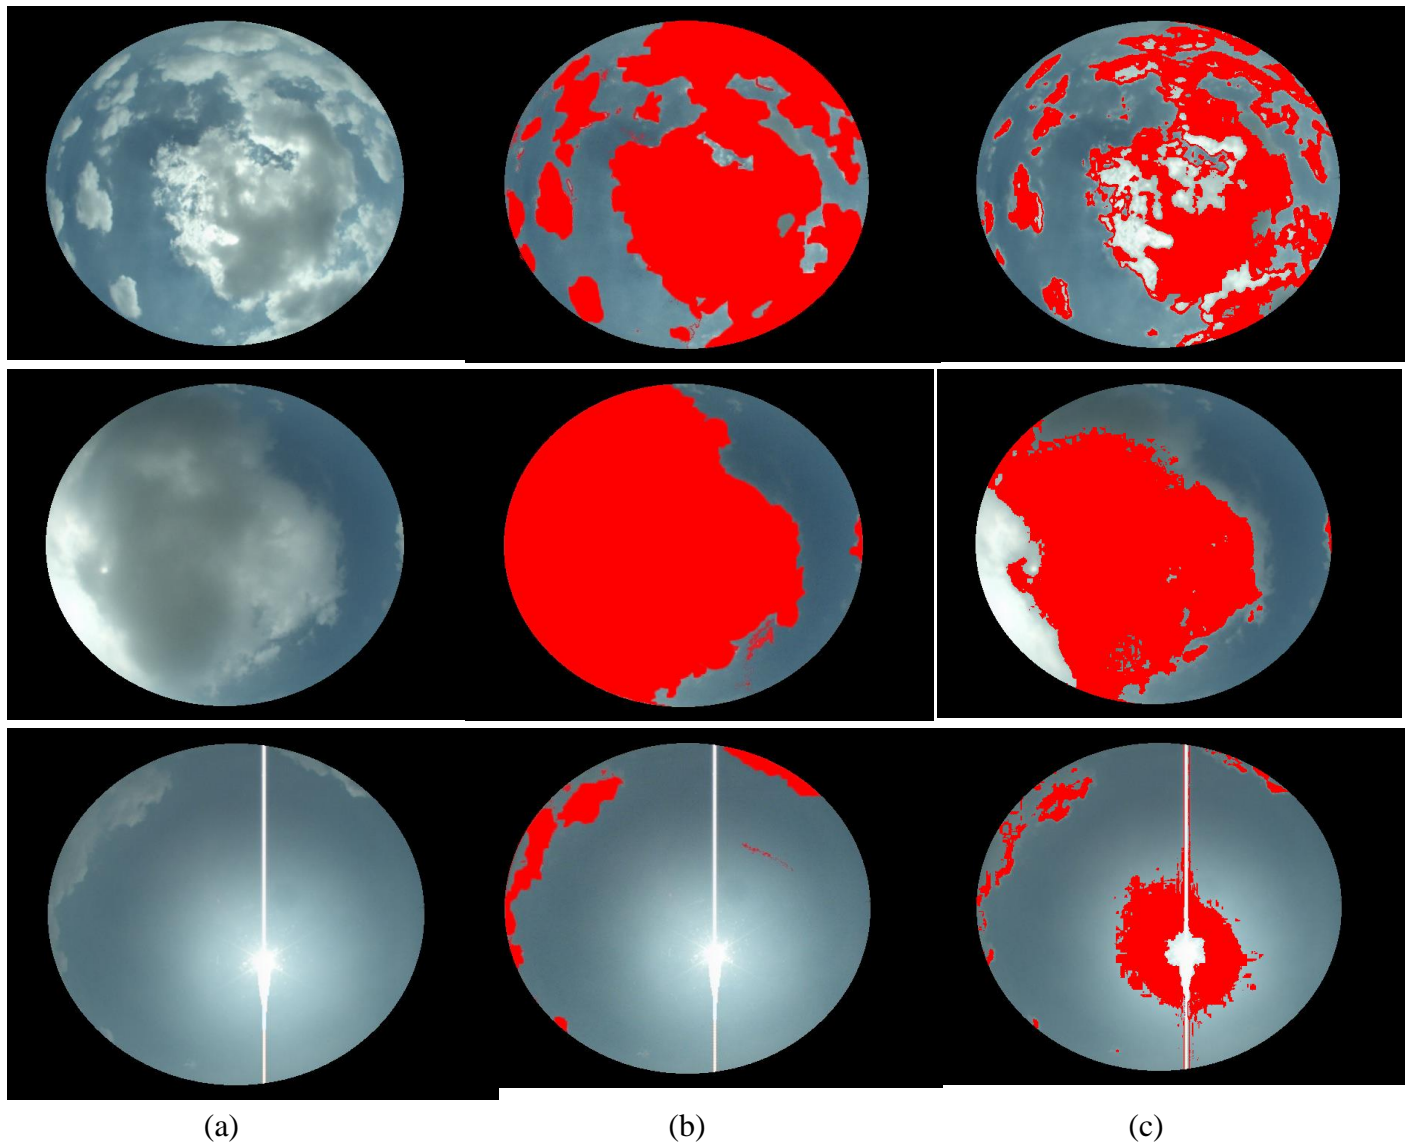

355

356

357

**Fig. 9.** Selected results: (a) Original images; (b) Detection results of the proposed method; (c) **Detection results of RBR 0.8-0.9**

358

359

360

361

362

Selected cloud detection results are shown in Fig. 9 (b). The proposed method using features from multi-scale local image patches can accurately detect clouds in the all-sky images. The pixels within the vertical line and the solar disk would not be detected as clouds even though their intensities are high. The Hough line detection and sun position detection successfully eliminated those pixels before performing classification. Compared with detection results of RBR 0.8-0.9 in Fig. 9 (c), the proposed

method can detect cloud pixels with satisfying accuracy with the proposed multi-level local patch feature extraction mechanism and combination of multiple expert decision.

To summarize the detection accuracy, the detection accuracy of various methods are plotted in Fig. 10. We compare the proposed method with ANN (Roy et al., 2001) and HYTA (Li et al., 2011). ANN utilized a feedforward back-propagation neural network to perform detection. HYTA employs dynamic thresholding based on minimum cross entropy when necessary. The ANN and HYTA methods outperform traditional RBR thresholding. Nevertheless, the accuracy of ANN and HYTA still has room for improvement. Using the single pixel color components described in Section 2.2 and utilizing SVM as the classifier can yield slightly improved accuracy compared with ANN and HYTA. Incorporating feature vector extracted from single level 15x15 neighborhood patch can further improve the accuracy compared with using only information from single pixel. The proposed method utilizing features extracted from multi-level neighborhood yields the best accuracy since multiscale information is considered.

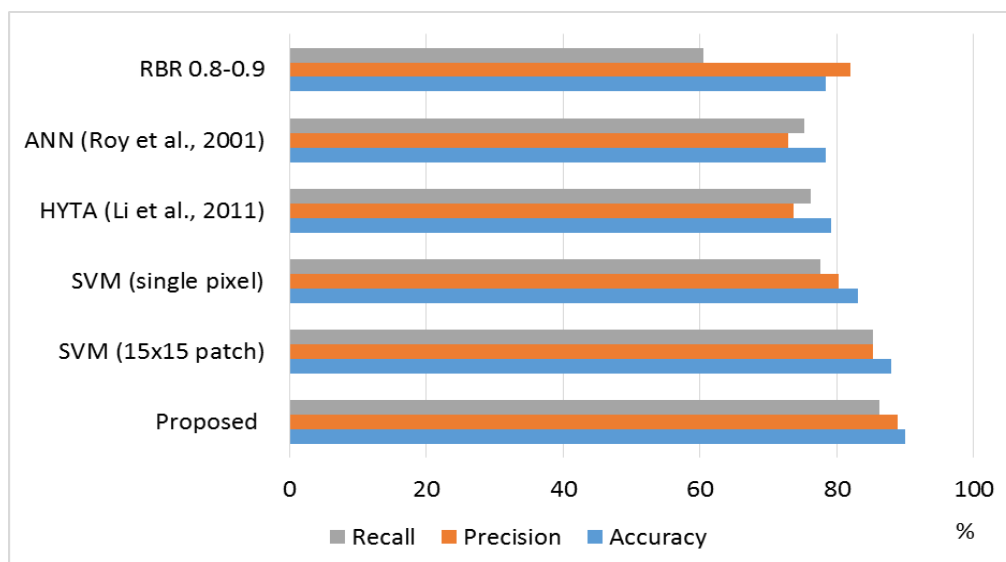

Fig. 10. Comparisons of different methods

## 4 Conclusions

With the development of all-sky cameras, the cloud conditions in the sky can be monitored and useful information can be extracted for solar irradiance prediction with refined spatial and temporal resolutions. Clouds play a critical role in affecting the amount of solar irradiance penetrating the atmosphere. With more

accurate cloud detection schemes, subsequent prediction modules that forecast solar irradiance could benefit a lot from the enhanced detection results. In this work, supervised learning methods are utilized to train various classifiers that can distinguish cloud pixels from non-cloud pixels in all-sky images. The classifiers implemented in this work include RBR thresholding, SVM, random forest, and Bayesian classifier. We propose to use features extracted from multi-level local image patches with different sizes to include local structure and multi-resolution information. Final decision is made according to multi-level classification results by various classifiers. A challenging dataset with ground truth labels is used to validate the detection schemes. Experiments have also shown that the proposed detection method yields better results than both fixed and dynamic RBR thresholding. Combining the information of multiple classifiers using voting can improve the detection accuracy. It is also validated that using color information in multi-level local neighborhood instead of only a single pixel is very helpful to improve the detection accuracy. To apply the proposed method on different all-sky cameras, images captured by various cameras can be added into the training set to enhance the robustness of the detector. For the selection of parameters  $Thr_{PCA}$  and  $N_v$  for different devices and sites, if the number of levels and feature length are fixed, the desired parameters should not be seriously affected even if the training samples are changed.

## Acknowledgements

The financial support provided by the Ministry of Science and Technology of Taiwan is gratefully acknowledged.

## References

- Bay, H, Ess, A., Tuytelaars, T., Gool, L. V., 2008. SURF: Speeded Up Robust Features. *Computer Vision and Image Understanding* 110, 346-359.
- Bernecker, D., Riess, C., Christlein, V., Angelopoulou, E., Hornegger, J., 2013. Representation learning for cloud classification. *Lecture Notes in Computer Science* 8142, 395-404.

- 409 Breiman, L., Friedman, J. H., Olshen, R. A., Stone, C. J., 1984. Classification and regression trees.  
410 Monterey, CA: Wadsworth & Brooks/Cole Advanced Books & Software.
- 411 Calbo, J., Sabburg, J., 2008. Feature extraction from whole-sky ground-based images for cloud-type  
412 recognition. *J. Atmos. Ocean. Tech.* 25, 3-14.
- 413 Cheng, HY, Yu, C.C., 2015. Multi-Model Solar Irradiance Prediction Based on Automatic Cloud  
414 Classification. *Energy* 91, 579-587.
- 415 Cheng, H.Y., Yu C.C., 2015. Block based cloud classification with statistical features and distribution of  
416 local texture features. *Atmospheric Measurement Techniques* 8, 1173–1182.
- 417 Chow, C.W., Urquhart, B., Lave, M., Dominguez, A., Kleissl, J., Shields, J., Washom, B., 2011. Intra-hour  
418 forecasting with a total sky imager at the UC San Diego solar energy testbed. *Solar Energy* 85,  
419 2881-2893.
- 420 Cristianini N, Shawe-Taylor J. An introduction to support vector machines and other kernel-based learning  
421 methods. Cambridge University Press, 2000.
- 422 Duda, R.O., Hart, P.E., Stork, D.G., 2001. Pattern classification. John Wiley & Sons, 2001; 2nd edn.
- 423 Feister, U. and Shields, J., 2005. Cloud and radiance measurements with the VIS/NIR daylight whole sky  
424 imager at Lindenberg (Germany). *Meteorol. Z.* 14, 627-639.
- 425 Fu, C.L., Cheng, H.Y., 2013. Predicting solar irradiance with all-sky image features via regression. *Solar*  
426 *Energy* 97, 537-550.
- 427 Gonzalez, R.C., Woods, R.E., 2002. Digital Image Processing 2nd Edition, Prentice Hall.
- 428 Gueymard, C.A., 2004. The sun's total and spectral irradiance for solar energy applications and solar  
429 radiation models, *Solar Energy* 76 (4), 423-453.
- 430 Heinemann, D., Lorenz, E., Girodo, M., 2006. Solar Irradiance Forecasting for the Management of Solar  
431 Energy Systems, Solar 2006, Denver, CO, USA.
- 432 Heinle, A., Macke, A., Srivastav, A., 2010. Automatic cloud classification of whole sky images. *Atmos.*  
433 *Measur. Technol.* 3, 557-567.

- 434 Huo, J., Lu, D., 2009. Cloud determination of all-sky images under low visibility conditions. *J. Atmos.*  
435 *Ocean. Technol.* 26 (10), 2172-2180.
- 436 Isosalo, A., M. Turtinen, and M. Pietik€ainen, 2007. Cloud characterization using local texture information.  
437 *Proc. Finnish Signal Processing Symp.*, Oulu, Finland, University of Oulu, 1-6.
- 438 Johnson, R., Hering W., Shields, J., 1989. Automated visibility and cloud cover measurements with a  
439 solid-state imaging system. Tech. Rep., University of California, San Diego, Scripps Institution of  
440 Oceanography, Marine Physical Laboratory, SIO Ref. 89-7, GL-TR-89-0061, 128.
- 441 Johnson, R., Shields, J., Koehler, T., 1991. Analysis and interpretation of simultaneous multi-station whole  
442 sky imagery. Marine Physical Laboratory. Scripps Institution of Oceanography, University of California  
443 San Diego, SIO 91-3, PL-TR-91-2214.
- 444 Kassianov, E., C. N. Long, and M. Ovtchinnikov, 2005. Cloud sky cover versus cloud fraction: Whole-sky  
445 simulations and observations. *J. Appl. Meteor.* 44, 86-98.
- 446 Kazantzidis, A., Tzoumanikas, P., Bais, A.F., Fotopoulos, S., Economou, G., 2012. Cloud detection and  
447 classification with the use of whole-sky ground-based images, *Atmospheric Research* 113, 80-88,
- 448 Kubota, M., T. Nagatsuma, and Y. Murayama, 2003. Evening corotating patches: A new type of aurora  
449 observed by high sensitivity all-sky cameras in Alaska. *Geophys. Res. Lett.* 30, 1612.
- 450 Li, Z., M. C. Cribb, F.-L. Chang, and A. P. Trishchenko, 2004. Validation of MODIS-retrieved cloud  
451 fractions using whole sky imager measurements at the three ARM sites. *Proc. 14th ARMScience Team*  
452 *Meeting*, Albuquerque, NM, Atmospheric Radiation Measurement Program 6, 2-6.
- 453 Li, Q., Lu, W., Yang, J., 2011. A Hybrid Thresholding Algorithm for Cloud Detection on Ground-Based.  
454 *Journal of Atmospheric and Oceanic Technology* 28, 1286–1296.
- 455 [Liu, L., Sun, X., Chen, F., Zhao, S., Gao, T., 2011. Cloud Classification Based on Structure Features of](#)  
456 [Infrared Images, \*Journal of Atmospheric and Oceanic Technology\* 28, 410-417.](#)
- 457 Long, C. N., Sabburg, J., Calb´o, J., and Pag`es, D., 2006. Retrieving cloud characteristics from  
458 ground-based daytime color all-sky images. *J. Atmos. Ocean. Tech.* 23, 633-652.

- 459 Lorenz, E., Hurka, J., Heinemann, D., Beyer, H.G., 2009. Irradiance Forecasting for the Power Prediction  
460 of Grid-Connected Photovoltaic Systems. *IEEE J. of Selected Topics in Applied Earth Observations and*  
461 *Remote Sensing* 2, 2-10.
- 462 Lowe, D. G., 2004. Distinctive image features from scale-invariant keypoints. *International Journal of*  
463 *Computer Vision* 60, 91-110.
- 464 Marquez, M., Coimbra, C.F.M., 2011. Forecasting of global and direct solar irradiance using stochastic  
465 learning methods, ground experiments and the NWS database. *Solar Energy* 85, 746-756.
- 466 Marquez, R., Coimbra, C.F.M., 2013. Intra-hour DNI forecasting based on cloud tracking image analysis,  
467 *Solar Energy* 91, 327-336
- 468 Martínez-Chico, M., Batlles, F.J., Bosch, J.L., 2011. Cloud classification in a mediterranean location using  
469 radiation data and sky images, *Energy* 36 (7), 4055-4062.
- 470 Perez, R., Ineichen, P., Moore, K., Kmiecik, M., Chain, C., George, R., Vignola, F., 2002. A new  
471 operational model for satellite-derived irradiances: description and validation. *Solar Energy* 73,  
472 307-317.
- 473 Perez, R., Kivalov, S., Schlemmer, J., Hemker Jr., K., Renne', D., Hoff, T., 2010. Validation of short and  
474 medium term operational solar radiation forecasts in the US. *Solar Energy* 84, 2161-2172.
- 475 Pfister, G., McKenzie, R. L., Liley, J. B., Thomas, A., Forgan, B. W., and Long, C. N., 2003. Cloud  
476 coverage based on all-sky imaging and its impact on surface solar irradiance. *J. Appl. Meteorol.* 42,  
477 1421-1434.
- 478 Remund, J., Perez, R., Lorenz, E., 2008. Comparison of solar radiation forecasts for the USA. *Proc. of the*  
479 *23rd European PV Conference*, 1.9-4.9, Valencia, Spain.
- 480 Roy, G., Hayman, S., Julian, W., 2001. Sky analysis from CCD images: cloud cover. *Lighting Research and*  
481 *Technology* 33 (4), 211-222.
- 482 Sabburg, J., Wong, J., 1999. Evaluation of a Ground-Based Sky Camera System for Use in Surface  
483 Irradiance Measurement. *Journal of Atmospheric and Oceanic Technology* 16, 752-759.
- 484 Shapiro, L. and George, C. S., 2001. *Computer Vision*. Prentice Books, Upper Saddle River.

- 485 Shields, J., Karr, M., Burden, A., Johnson, R., Hodgkiss, W., 2007. Continuing support of cloud free line of  
486 sight determination including whole sky imaging of clouds. Final Report for ONR Contract  
487 N00014-01-D-0043DO #13, Marine Physical Laboratory, Scripps Institution of Oceanography,  
488 University of California San Diego, Technical Note 273.
- 489 Shields, J., Karr, M., Burden, A., Johnson, R., Mikuls, V., Streeter, J., Hodgkiss, W., 2009. Research toward  
490 Multi-Site Characterization of Sky Obscuration by Clouds. Final Report for Grant N00244-07-1-009,  
491 Marine Physical Laboratory, Scripps Institution of Oceanography, University of California San Diego,  
492 Technical Note 274.
- 493 Tapakis, R., Charalambides, A.G., 2013. Equipment and methodologies for cloud detection and  
494 classification: A review. *Solar Energy* 95, 392-430.
- 495 West, S.R., Rowe, D., Sayeef, S., Berry, A., 2014. Short-term irradiance forecasting using skycams:  
496 Motivation and development. *Solar Energy* 110, 188–207.
- 497 Wood-Bradley, P., Zapata, J., Pye, J., 2012. Cloud tracking with optical flow for short-term solar forecasting.  
498 50th conference of the Australian Solar Energy Society, Melbourne, December.
- 499 Zhuo, W., Cao, Z. G, Xiao, Y., 2014, Cloud classification of ground-based images using texture–structure  
500 features. *Journal of Atmospheric and Oceanic Technology* 31, 79-92.
